# Supplementary material for: MicroRNAs as Plasma Biomarkers of Hepatocellular Carcinoma in Patients with Liver Cirrhosis—A Cross-Sectional Study
Source: MDPI journal article supplement (doi:10.3390/ijms25042414), 2024-02-19
Supplement: s1 [file s1]

## Supplementary material for

# MicroRNAs as plasma biomarkers of hepatocellular carcinoma in patients with liver cirrhosis – a cross-sectional study

Robin Zenlander<sup>1,2,3</sup> (ORCID 0000-0003-0919-5580), MD, PhD-student

Hugh Salter<sup>2</sup>, PhD

Stefan Gilg<sup>3</sup>, MD, PhD

Gösta Eggertsen<sup>1,3</sup>, MD, PhD

Per Stål<sup>3,4</sup> (ORCID 0000-0003-2915-1964), MD, PhD

<sup>1</sup> Department of Clinical Chemistry, Karolinska University Hospital, 141 86 Stockholm, Sweden

<sup>2</sup> Department of Laboratory Medicine, Karolinska Institutet, 141 52 Stockholm, Sweden

<sup>3</sup> Department of Medicine, Huddinge, Karolinska Institutet, 141 86 Stockholm, Sweden

<sup>4</sup> Division of Hepatology, Department of Upper GI Diseases, Karolinska University Hospital, 141 86 Stockholm, Sweden

**Keywords:** HCC, surveillance, circulating biomarkers, miRNA, proteins

## Correspondence and reprint requests:

Robin Zenlander

Phone: +46 (0) 72 582 34 27, E-mail: [robin.zenlander@ki.se](mailto:robin.zenlander@ki.se)

### Supplementary figure S1

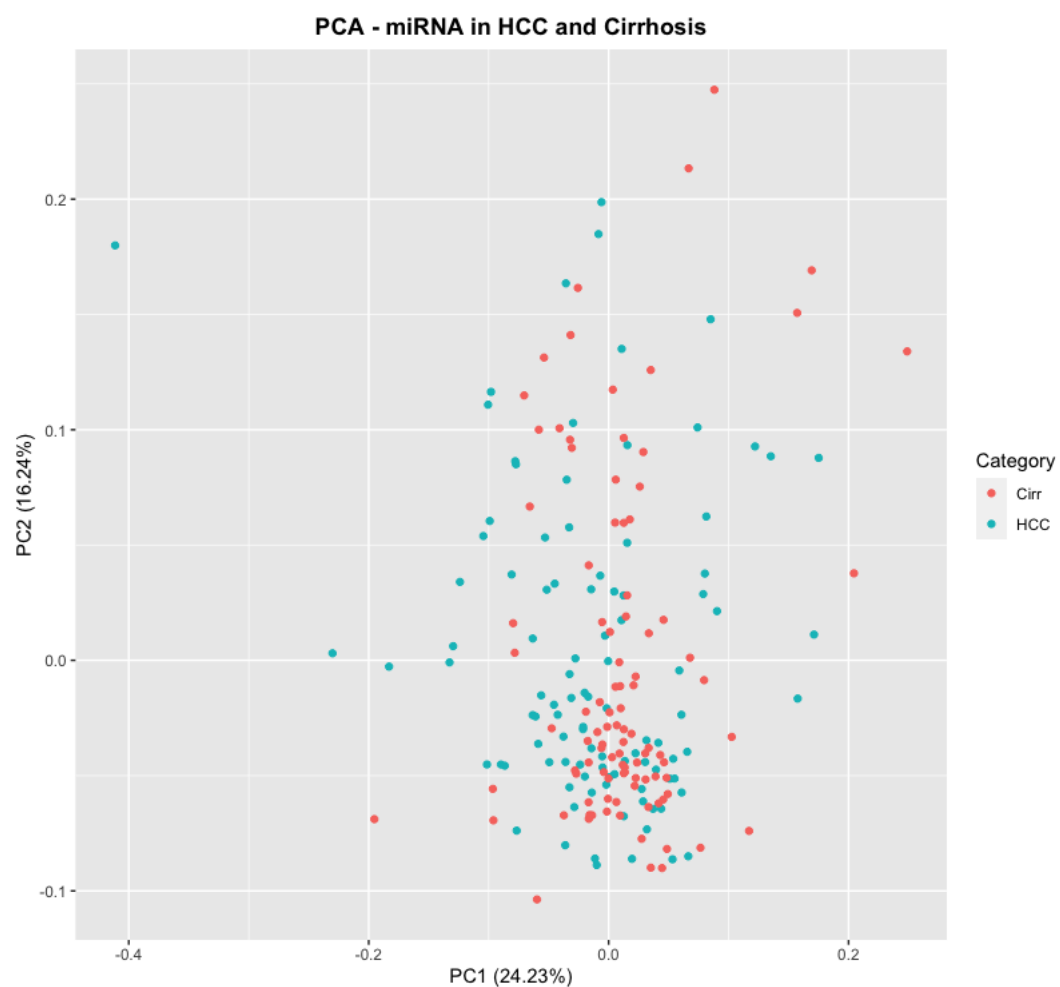

**Supplementary figure S1.** Principal component analysis (PCA) of microRNA for HCC and Cirrhosis. Principal component 1 (PC1) accounts for 24.23% while principal component 2 (PC2) accounts for 16.24%.

**Supplementary figure S2**

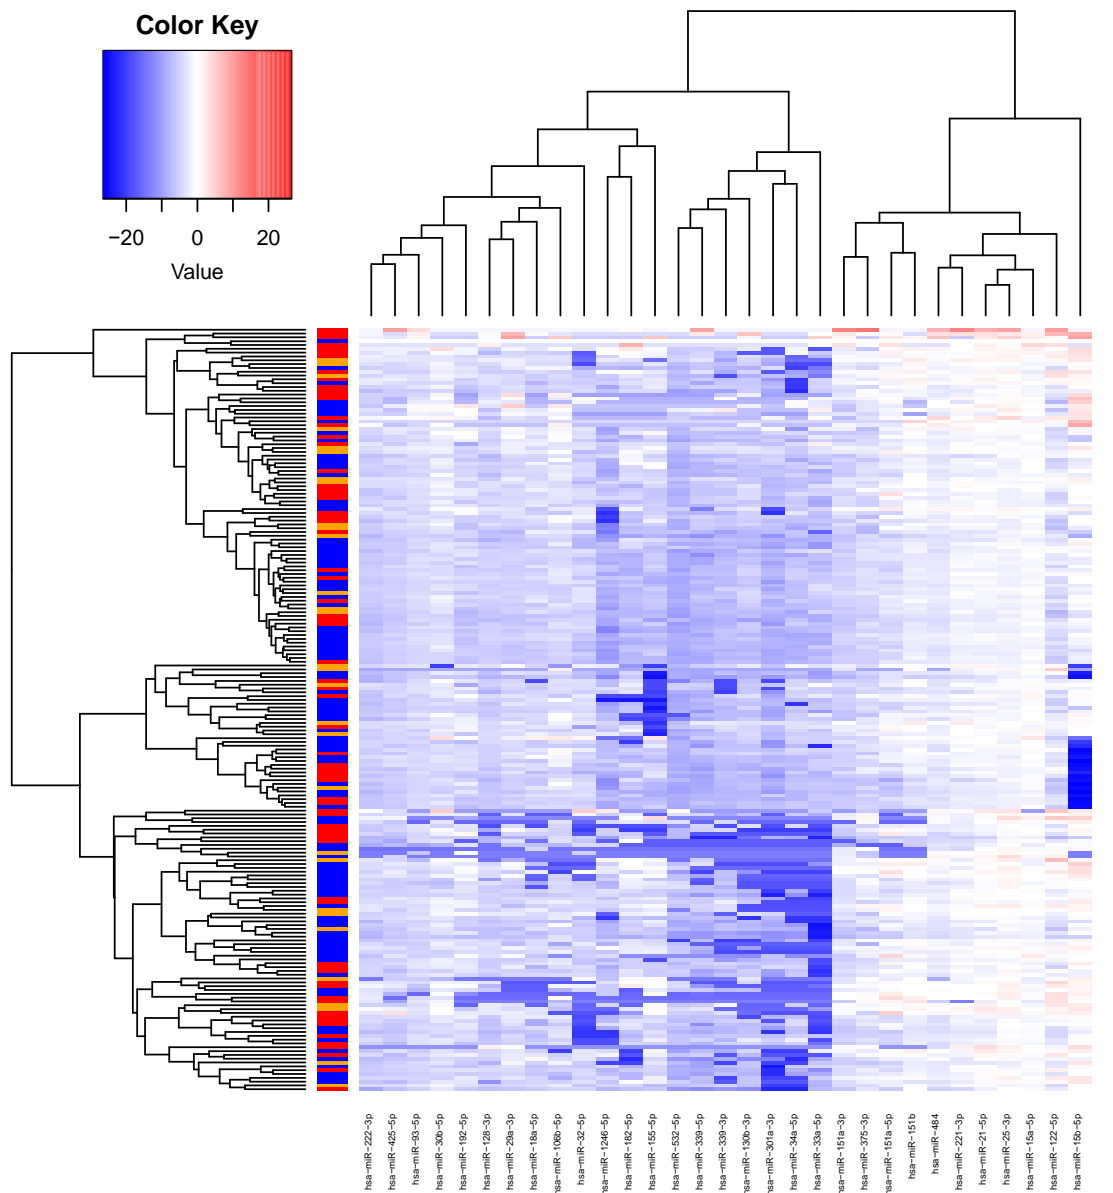

**Supplementary figure S2.** Hierarchical clustering with patients depicted in rows and microRNA in columns. The Color Key depicts the CT-value for each microRNA. The left row side colors represent patient category with blue = cirrhosis, orange = HCC and red = HCC + cirrhosis. There were no enrichments of either category in the clusters generated.

**Supplementary figure S3**

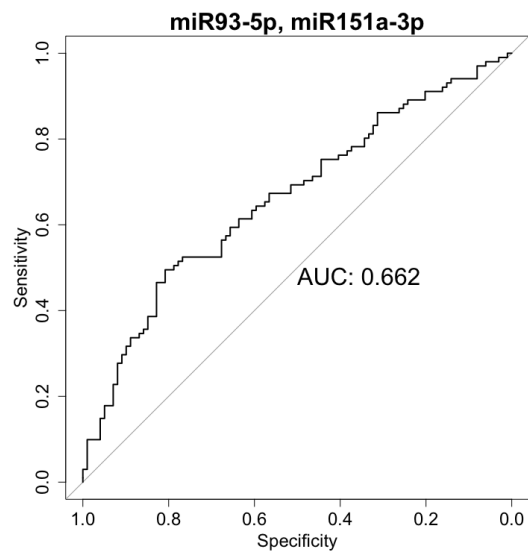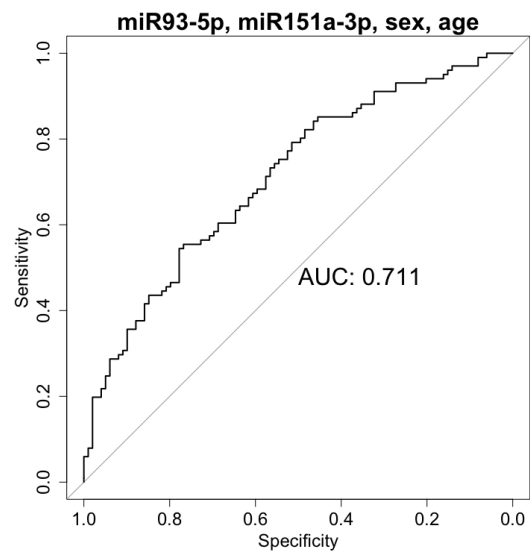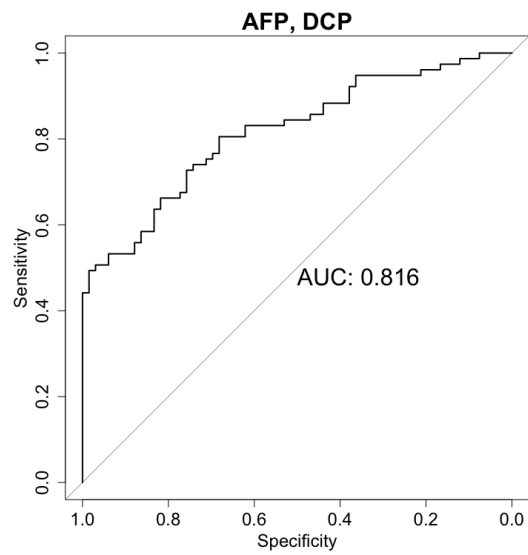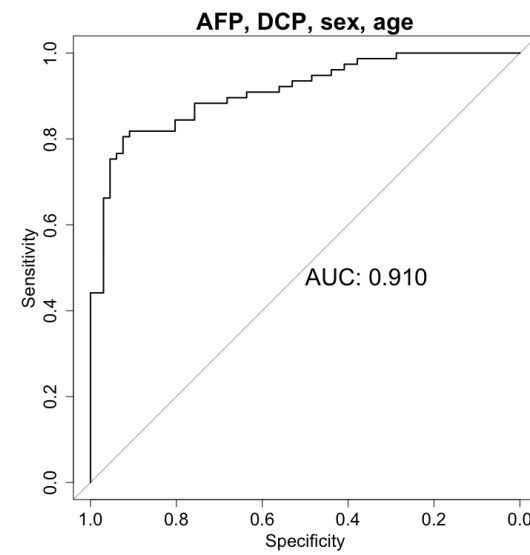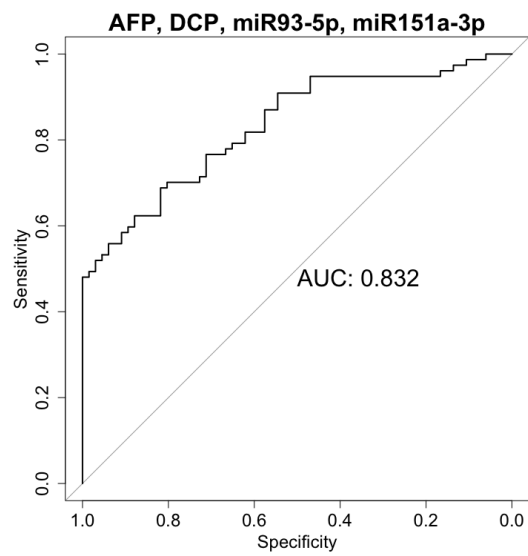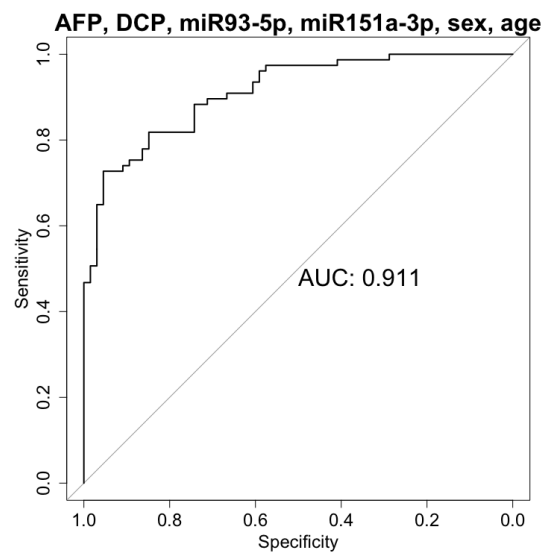

**Supplementary figure S3.** ROC curves for regression models depicted in Table 4 in main article. AFP and DCP in combination had a AUC of 0.816, but increased to 0.832 when miR93-5p and miR151a-3p were added. However, when sex and age were also included with AFP and DCP, the addition of miR93-5p and miR151a-3p did not improve the AUC further.
